# Supplementary material for: Characterization of a Fungal Virus Representing a Novel Genus in the Family Alphaflexiviridae
Source: MDPI journal article supplement (doi:10.3390/v15020339), 2023-01-25
Supplement: s1 [file s1]

**Table S1.** Details of viruses referred to in this study.

| Name                                                       | Abbreviation | Accession               | Length (nt) | References  |
|------------------------------------------------------------|--------------|-------------------------|-------------|-------------|
| Cymbidium mosaic virus                                     | CymMV        | NC_001812.1             | 6227        | [41]        |
| Cassia mild mosaic virus                                   | CaMMV        | MN031278.1              | 7829        | [42]        |
| Pepino mosaic virus                                        | PepMV        | NC_004067.1             | 6410        | [43]        |
| Narcissus mosaic virus                                     | NMV          | NC_001441.1             | 6955        | [44]        |
| Indian citrus ringspot virus                               | IcrV         | NC_003093.1             | 7560        | [45]        |
| Lolium latent virus                                        | LLV          | NC_010434.1             | 7674        | [46]        |
| Vanilla latent virus                                       | VLV          | NC_035204.1             | 7462        | [47]        |
| Strawberry mild yellow edge virus                          | SMYEV        | NC_003794.1             | 5966        | [48]        |
| Donkey orchid symptomless virus                            | DosV         | NC_022894.1             | 7838        | [49]        |
| Botrytis virus X                                           | BVX          | NC_005132.1             | 6966        | [35]        |
| Garlic virus A                                             | GVA          | NC_003375.1             | 8660        | [50]        |
| Garlic virus C                                             | GVC          | NC_003376.1             | 8405        | [50]        |
| Garlic virus X                                             | GVX          | NC_001800.1             | 8106        | [51]        |
| Garlic virus E                                             | GVE          | NC_004012.1             | 8451        | [52]        |
| Shallot virus X                                            | ShVX         | NC_003795.1             | 8832        | [53]        |
| Potato virus X                                             | PVX          | NC_011620.1             | 6435        | [54]        |
| Sclerotinia sclerotiorum mitovirus 9                       | SsMV9        | KF913884.1 <sup>a</sup> | 2562        | [55]        |
| Sclerotinia sclerotiorum mitovirus 17                      | SsMV17       | KP900924.1 <sup>a</sup> | 2447        | [55]        |
| Sclerotinia sclerotiorum debilitation-associated RNA virus | SsDRV        | NC_007415.1             | 5470        | [19]        |
| Sclerotinia sclerotiorum ourmia-like virus 18              | SsOIV18      | MW454909.1 <sup>a</sup> | 3336        | Unpublished |
| Sclerotinia sclerotiorum ourmia-like virus 14              | SsOIV14      | MT646410.1 <sup>b</sup> | 3368        |             |

<sup>a</sup> complete coding sequence (CDS); <sup>b</sup> partial sequence.
